# Supplementary material for: Machine Learning and Novel Biomarkers Associated with Immune Infiltration for the Diagnosis of Esophageal Squamous Cell Carcinoma
Source: Hindawi journal article supplement (doi:10.1155/2022/6732780), 2022-08-30

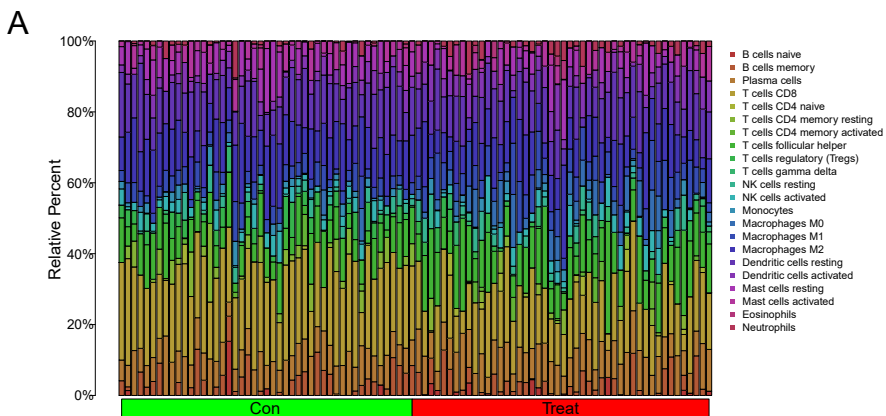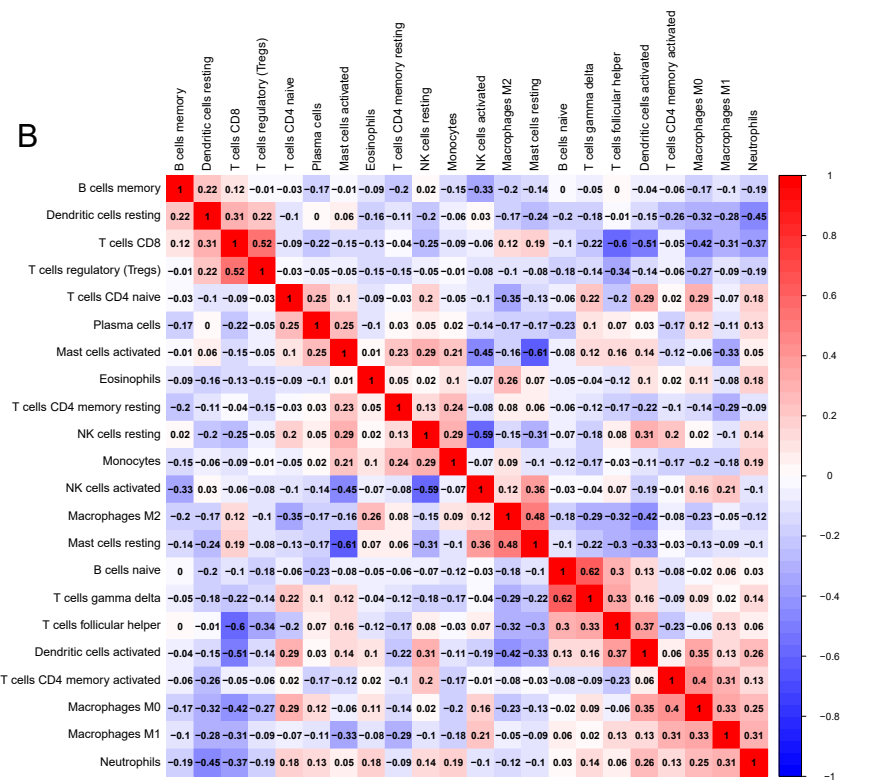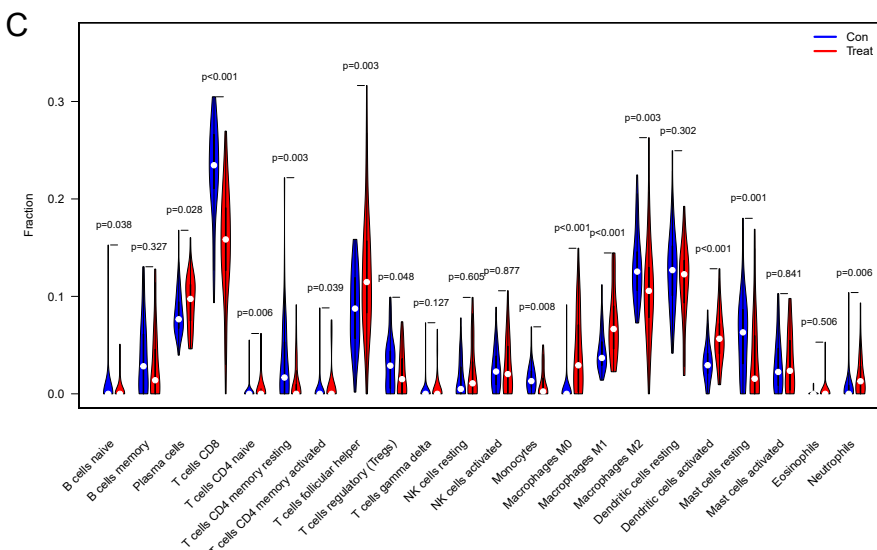

Supplement: f1 [file 6732780.f1.pdf]
